# Supplementary material for: A novel magnetic metal–organic framework absorbent for rapid detection of aflatoxins B1B2G1G2 in rice by HPLC-MS/MS
Source: Royal Society of Chemistry journal article supplement (doi:10.1039/d2ay00167e), 2022-01-01
Supplement: d2ay00167e1.pdf [file d2ay00167e1.pdf]

**Based on a Novel Magnetic Metal–organic Framework  
Absorbent for Rapid Detection Aflatoxins B<sub>1</sub>B<sub>2</sub>G<sub>1</sub>G<sub>2</sub> in Rice by  
HPLC-MS/MS**

Ling-Juan Wang <sup>a</sup>, Zhi-Wei Chen <sup>a</sup>, Teng-Zhou Ma <sup>c</sup>, Jiang Qing <sup>c</sup>, Fang Liu <sup>a, b</sup>, Zhou  
Xu <sup>a</sup>, Ye Jiao <sup>a</sup>, Shi-Hua Luo <sup>a</sup>, Yun-Hui Cheng <sup>\*a</sup>, Li Ding <sup>\*a</sup>

- a. School of Food Science and Bioengineering, Changsha University of Science & Technology, Changsha 410114, China
- b. Changsha Harmony Health Medical Laboratory Co., Ltd, Changsha 410000, China
- c. Technical Center for Industrial Product and Raw Material Inspection and Testing, Shanghai Customs, Shanghai 200135, China

Corresponding author:

Li Ding \*E-mail: dingli0824@126.com. Tel.: +86 13787134650

Yun-Hui Cheng \*E-mail: cyh@csust.edu.cn.

### **Synthesis of Fe<sub>3</sub>O<sub>4</sub>@UiO-66**

Fe<sub>3</sub>O<sub>4</sub>@UiO-66 materials were prepared implementing a simple solvent–thermal method according to the published procedure <sup>[1, 2]</sup> with small modifications. In detail, ZrCl<sub>4</sub> (0.15 g), terephthalic acid (0.13 g), and the newly synthesized Fe<sub>3</sub>O<sub>4</sub> nanoparticles (0.2 g) were dissolved in 80 mL of DMF. Subsequently, 4 mL of acetic acid were added to the solution. The solution thus obtained was transferred to a Teflon autoclave, which was heated at 130 °C for 12 h. Afterwards, the reaction mixture was left to cool down to room temperature. Finally, the magnetic nanocomposites were collected and washed three times with ultrapure water and Ethanol. The MMOFs thus isolated were dried at 70 °C overnight.

### **Synthesis of Fe<sub>3</sub>O<sub>4</sub>@UiO-66-COOH**

Fe<sub>3</sub>O<sub>4</sub>@UiO-66-COOH materials were prepared by solvent–thermal method <sup>[2][3]</sup> with small modifications. In detail, ZrCl<sub>4</sub> (0.93 g), 1,2,4-Benzenetricarboxylic acid (0.85 g), and the newly synthesized Fe<sub>3</sub>O<sub>4</sub> nanoparticles (1 g) were dissolved in 17.5 mL of water. Subsequently, 2 mL of HCl was added to the solution. The solution thus obtained was transferred to a Teflon autoclave, which was heated at 100 °C for 24 h. Afterwards, the reaction mixture was left to cool down to room temperature. Finally, the magnetic nanocomposites were collected and washed three times with ultrapure water and Methanol. The MMOFs thus isolated were dried at 70 °C overnight.

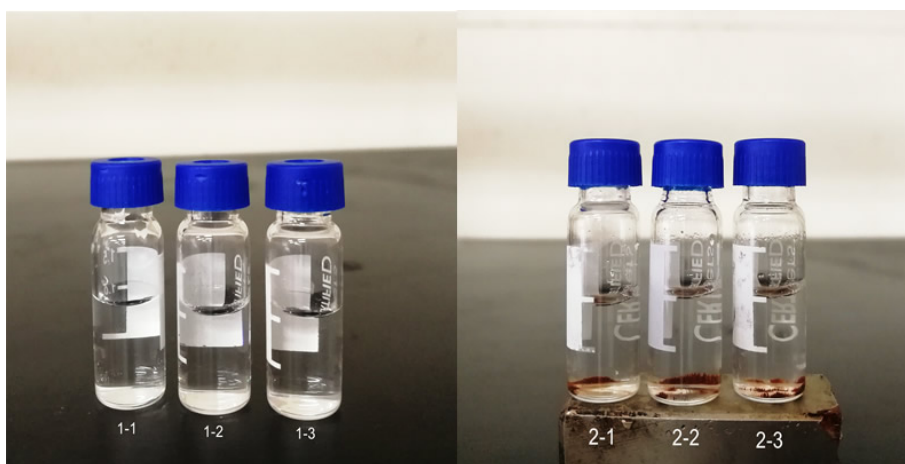

Fig. S1. Comparison of photos before purification (1-1,1-2,1-3) and after purification (2-1,2-2,2-3)

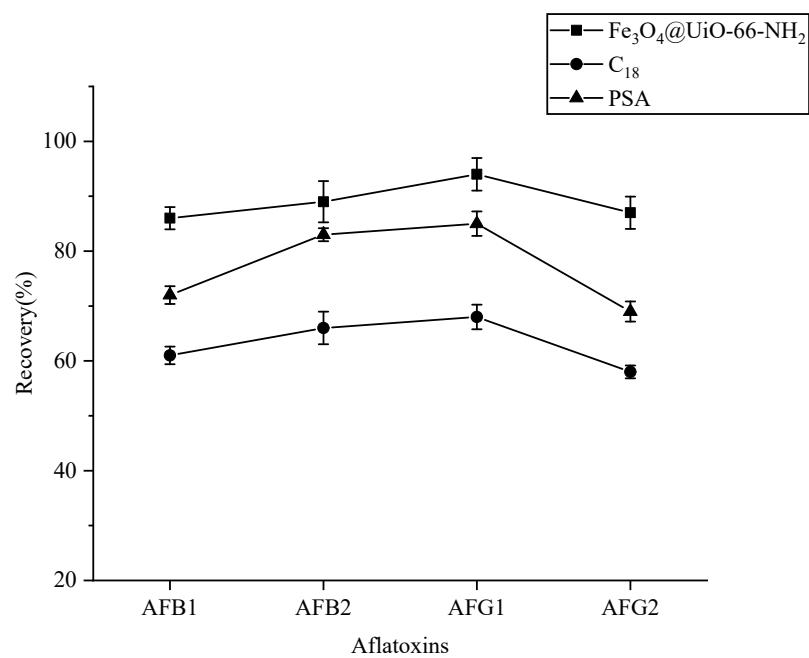

Fig. S2. Comparison of the recovery rates obtained for the purification of rice samples using

$\text{Fe}_3\text{O}_4@\text{UiO-66-NH}_2$ ,  $\text{C}_{18}$ , and primary secondary amine (PSA) as adsorbents.

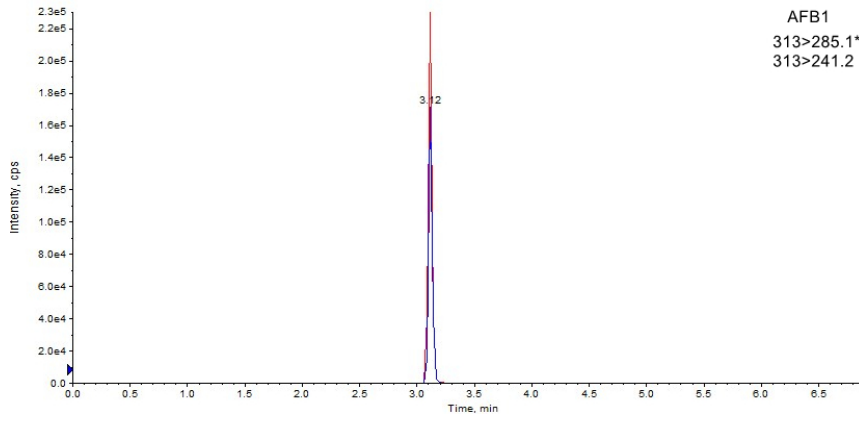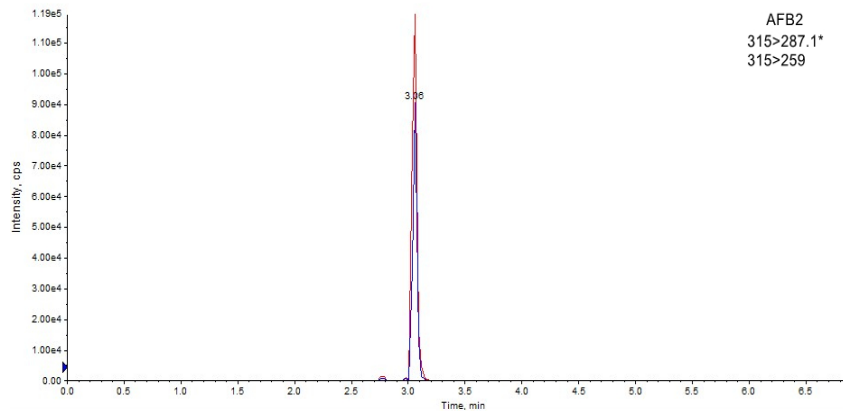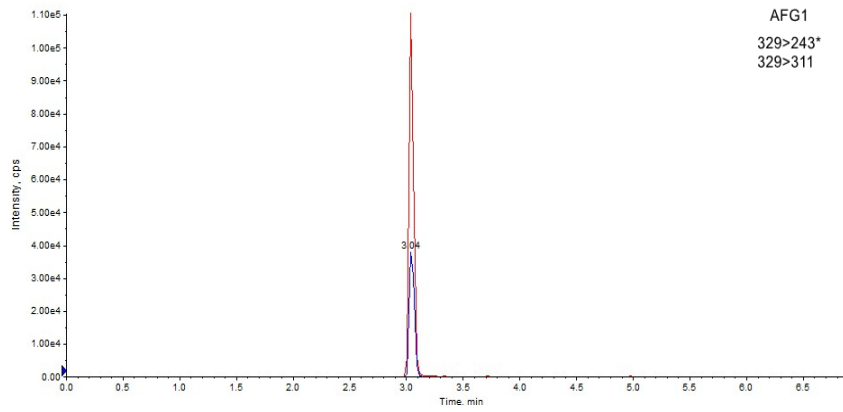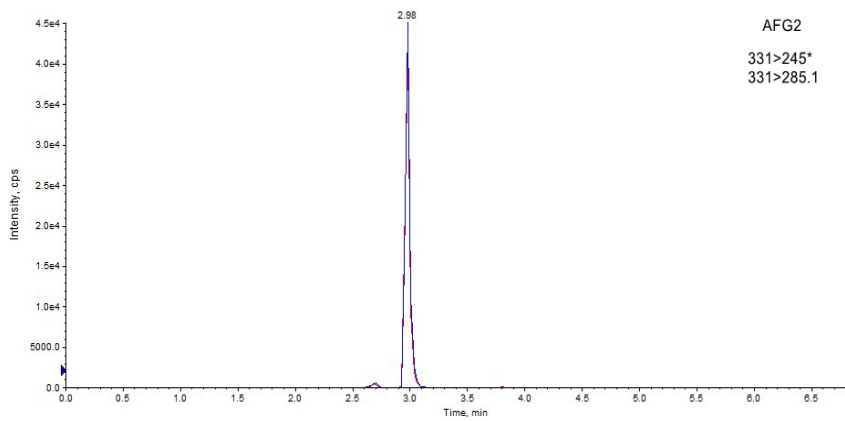

Fig. S3. Chromatograms of the four AFs in rice samples

## Reference

1. Kalaj, M., Palomba, J. M., Bentz, K. C., Cohen, S. M., Multiple functional groups in UiO-66 improve chemical warfare agent simulant degradation. *Chem Commun (Camb)*. 2019, 55, 5367-5370.
2. Far, H. S., Hasanzadeh, M., Nashtaei, M. S., Rabbani, M., Haji, A., Hadavi Moghadam, B., PPI-Dendrimer-Functionalized Magnetic Metal–Organic Framework (Fe<sub>3</sub>O<sub>4</sub>@MOF@PPI) with High Adsorption Capacity for Sustainable Wastewater Treatment. *ACS Applied Materials & Interfaces*. 2020, 12, 25294-25303.
3. Khabzina, Y., Dhainaut, J., Ahlhelm, M., Richter, H. J., Reinsch, H., Stock, N., Farrusseng, D., Synthesis and Shaping Scale-up Study of Functionalized UiO-66 MOF for Ammonia Air Purification Filters. *Industrial and engineering chemistry research*. 2018, 57, 8200-8208.
